# Supplementary material
Source: MDPI journal article supplement (https://www.mdpi.com/2674-0583/2/2/7)
Supplement: s1 [file s1]

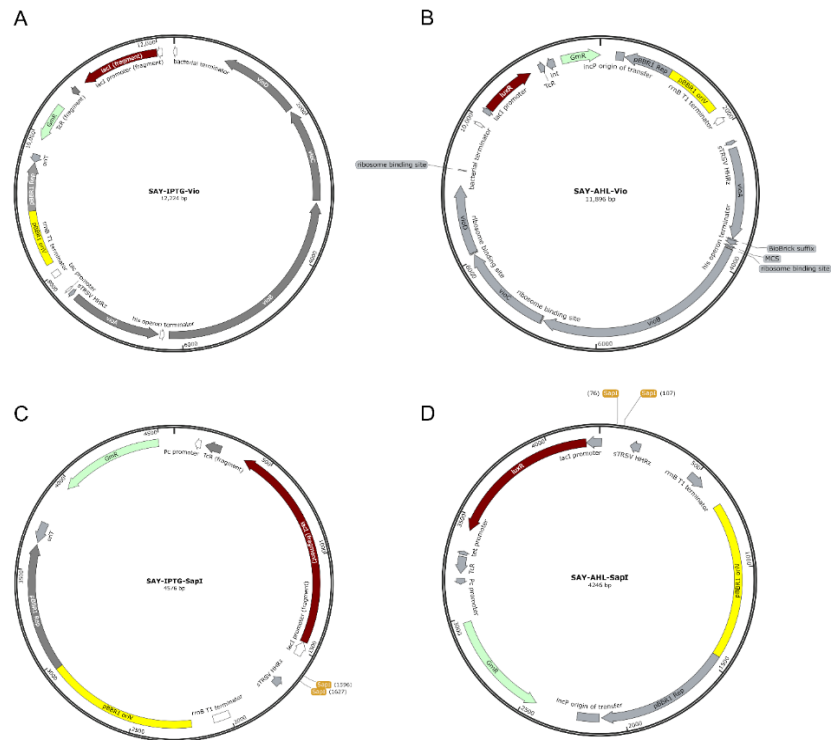

**Figure S2. Vector Maps with violacein pathway and empty vectors.** A. SAY-IPTG-Vio. B SAY-AHL-Vio. C SAY-AHL-SapI. D SAY-IPTG-SapI

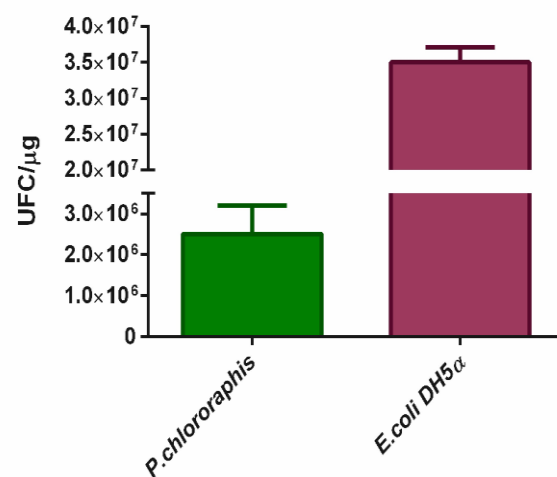

**Figure S3. Electroporation efficiency.** The *P. chlororaphis* and *E. coli* DH5α cultures were subjected to the laboratory efficiency protocols and the OD values of both were normalized. They were transformed with 200ng SEVA-631 supercoiled plasmid. Serial dilutions were carried out and 100 μL were seeded on plates with gentamicin.

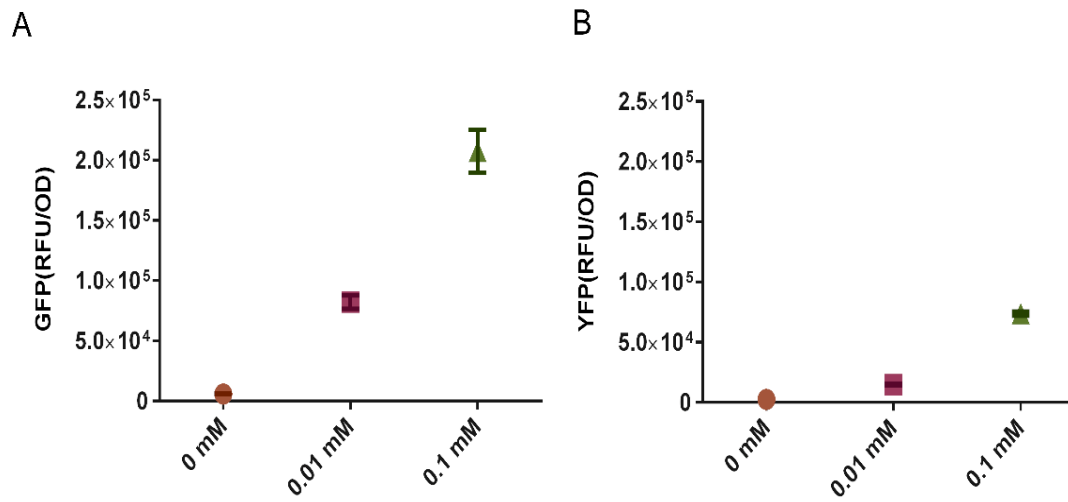

**Figure S4. Normalized GFP measurements in kinetics of *P. chlororaphis* wild-type strain.** A. GFP measurements normalized by OD using IPTG as inducer, vector used SAY-IPTG-GFP. B. GFP measurements normalized by OD using IPTG as inducer, vector used SAY-IPTG-YFP.

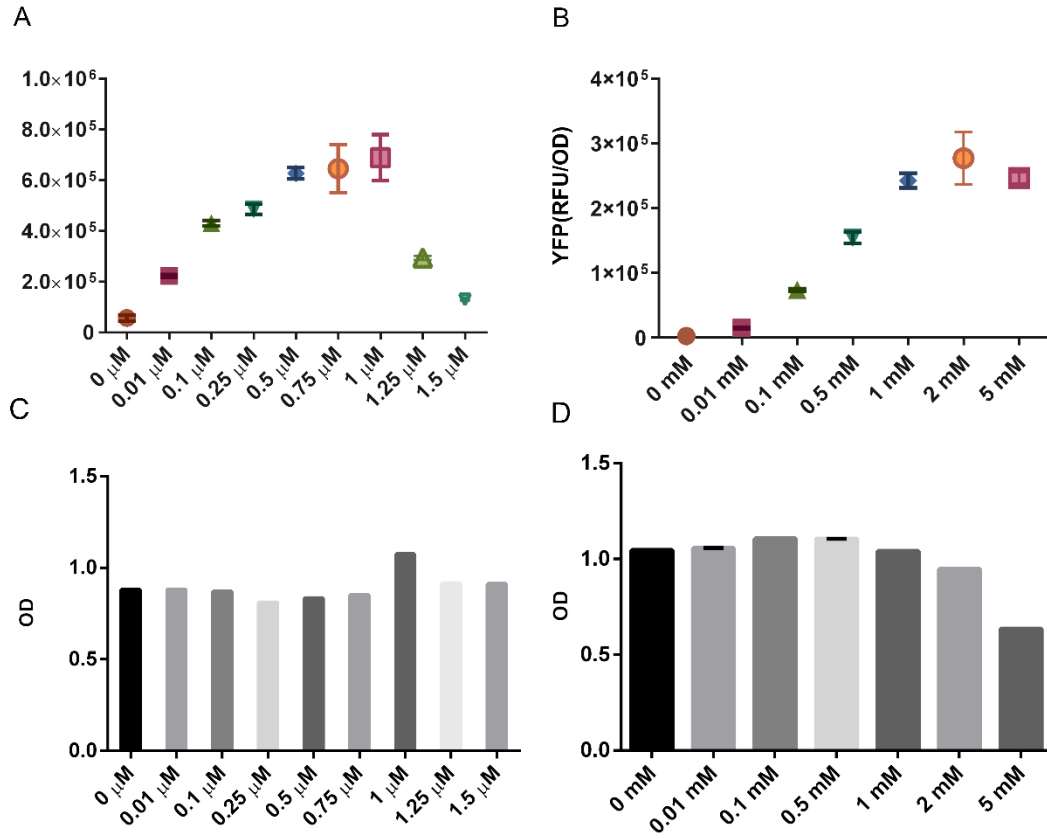

**Figure S5. Normalized fluorescence production and OD measurements at induction gradient points.** A. YFP reporter gene expression vector, measured in Relative Fluorescence Units (RFU) normalized by optical density using different concentrations of exogenous C6-AHL as inducer, (OD). B. Displays the response of YFP induction to a gradient of IPTG induction at different concentrations. C. OD measurements at vector SAY-AHL-YFP induction points. D. OD measurements at vector SAY-IPTG-YFP induction points.

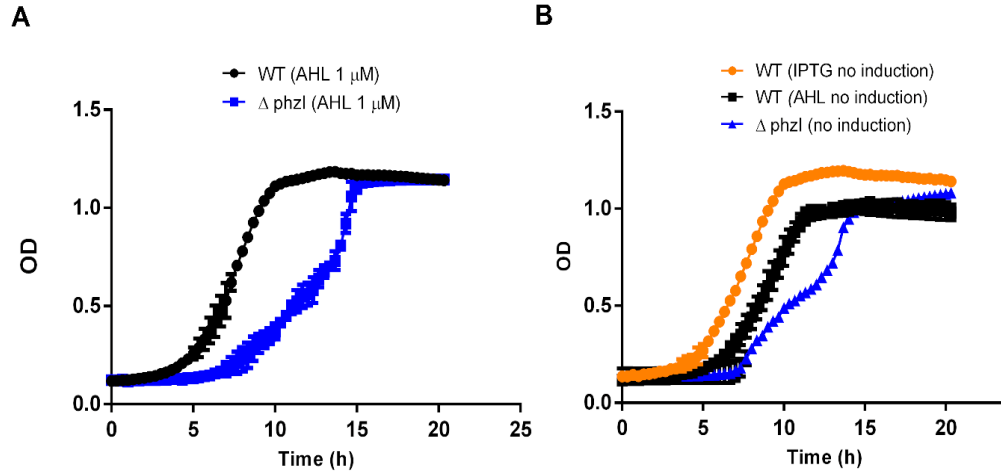

**Figure S6. OD measurements in kinetics of *P. chlororaphis*  $\Delta$ phzI mutant and wild-type strain *P. chlororaphis* ATCC 9446.** A. OD measurements in *P. chlororaphis*, using exogenous addition of C6-AHL at 1  $\mu$ M on wild-type *P. chlororaphis* and  $\Delta$ phzI mutant. B. OD measurements on assay of autoinduction capacity of SAY-AHL-YFP vector in wild type (WT) and  $\Delta$ phzI mutant strains. SAY-IPTG at 0 mM induction is shown as a reference.

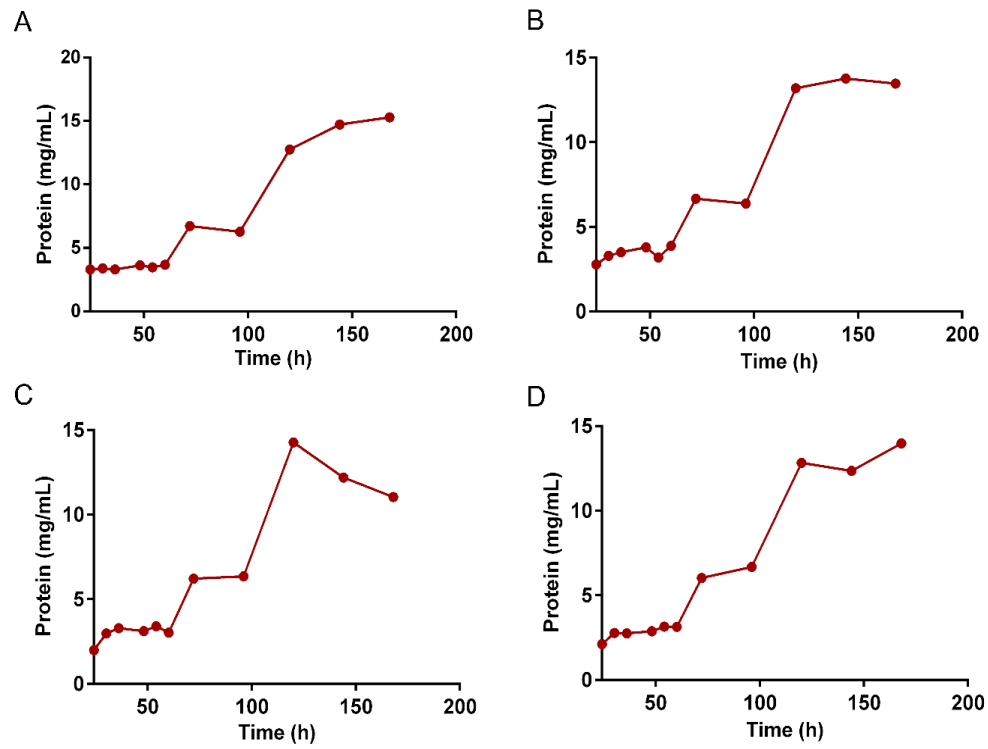

**Figure S7. Total protein measurements with SAY-AHL-Vio vector in shake flasks.** A. SAY-AHL-Vio, M9-sucrose at 1  $\mu$ M of induction. B. SAY-AHL-Vio, M9-glucose at 1  $\mu$ M of induction. C. SAY-IPTG-Vio, M9-glucose at 1 mM of induction. D. SAY-IPTG-Vio, M9-sucrose at 1 mM of induction.

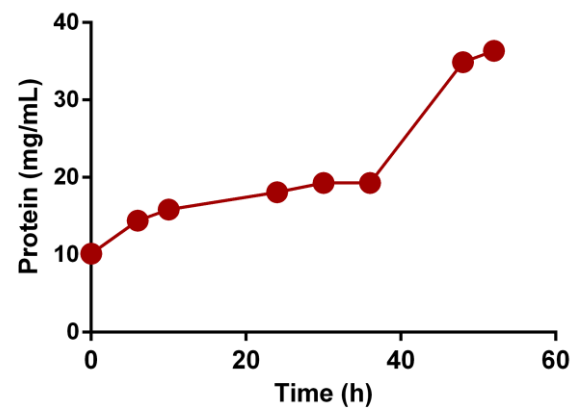

Figure S8. Total protein quantified on bioreactor. Plasmid SAY-AHL-Vio
